# Supplementary material
Source: Research Square preprint supplement (doi:10.21203/rs.3.rs-9237037/v1)
Supplement: Supplementary file 1 [file fec0f6faed281b539ea15c0f.docx]

**15 questions of the qualitative research**

Section 1: Determinants of Patient Satisfaction

1. What key factors, in your experience, contribute to high-quality patient care within your unit?

2. What factors do you believe influence patients’ decisions to use this outpatient clinic?

Section 2: Individual Attributes and Professional Competencies

1. Which aspects of your personal characteristics (e.g., personality traits) do you consider important for enhancing patient satisfaction?

2. Which professional skills do you believe contribute most to improving patient satisfaction?

3. What specific practices or approaches do you adopt in your daily work to enhance patient satisfaction?

4. To what extent do you believe that your professional experience influences patient satisfaction?

5. To what extent do you believe that your education and training contribute to patient satisfaction?

Section 3: Teamwork and Organizational Dynamics

1. How would you describe your working relationships with colleagues?

2. In your view, how do relationships among staff members influence patient satisfaction?

3. How would you describe the scope of your role—do you follow a strictly defined set of responsibilities, or do you perform a broader range of tasks?

4. How would you characterize your work overall (e.g., engaging, routine), and do you think this affects the quality of care provided?

Section 4: Patient Interaction and Care Experience

1. How would you describe the relationships you develop with patients, and how do these relationships affect patient satisfaction?

Section 5: Organizational Context and Infrastructure

1. To what extent do you consider the organizational structure of the Local Health Unit (TOMY), within the framework of the 2nd Health Region, to influence patient satisfaction?

2. How would you evaluate your physical work environment in relation to the following aspects:

* Ergonomics

* Temperature

* Lighting

* Noise levels

* Aesthetic quality of the space

* Cleanliness

* Safety and hygiene conditions

* Availability and adequacy of equipment

* Logistical infrastructure (e.g., internet, air conditioning, scanners, photocopiers)

Section 6: Feedback and Continuous Improvement

1. What role does feedback (from patients or colleagues) play in shaping the quality of the services you provide?
